# Supplementary material for: Comparison of Hemodynamic Response between Patients with Systolic Heart Failure Differing in Serum Aldosterone Concentrations during and after a 6-Minute Walk Test
Source: MDPI journal article supplement (doi:10.3390/jcm12031007), 2023-01-28
Supplement: s1 [file s1]

## Supplementary material

Several factors influence serum aldosterone concentration, including mineralocorticoid antagonists and renal function. In crude, uncontrolled analysis, these parameters differ significantly between patients with systolic HF and lower (the combined lower and middle tertiles - T1&T2) and higher (third tertile - T3) serum aldosterone concentration.

To mitigate these effects, we performed case-control matching between patients from T1&T2 and T3 groups for the use of spironolactone (set at no difference) and creatinine concentration (up to a 0.5 mg/dl acceptable difference). From the 306 patients studied, we obtained two groups of matched patients, each with 85 individuals. The comparisons of continuous and discrete data by the paired nonparametric Wilcoxon test can be found in Table S1. The qualitative data were compared by the exact Fisher test and are shown in Table S2.

**Table S1.** Comparison of continuous and discrete data of clinical characteristics of patients with HF and LVEF <50% and implanted defibrillating device divided into subgroups with lower (<195.0 pg/ml) and higher (>195.0 pg/ml) serum aldosterone concentration. Patients from both groups are case-control matched using the criteria the same rate of spironolactone use and no more than 0.5 mg/dl difference in the creatinine concentration. Data are presented as median and (25th-75th percentiles), p-values come from the nonparametric paired Wilcoxon test.

|                                      | Serum aldosterone concentration |                   |                       |                  | p-value |
|--------------------------------------|---------------------------------|-------------------|-----------------------|------------------|---------|
|                                      | < 194. pg/ml<br>N=85            |                   | > 194.0 pg/ml<br>N=85 |                  |         |
|                                      | Median                          | 25 - 75 P         | Median                | 25 - 75 P        |         |
| Age, years                           | 63.42                           | 56.92 - 70.04     | 64.60                 | 56.17 - 73.33    | 0.9354  |
| BMI, kg/m²                           | 29.15                           | 25.75 - 31.97     | 28.18                 | 25.17 - 31.75    | 0.7617  |
| NYHA class                           | 2.00                            | 2.00 - 3.00       | 2.00                  | 2.00 - 3.00      | 0.6308  |
| weeks from ICD/CRT-D implantation    | 17.00                           | 7.00 - 30.00      | 19.00                 | 9.50 - 35.50     | 0.1497  |
| Aldosterone, pg/ml                   | 140.00                          | 114.00 - 165.00   | 255.00                | 225.00 - 353.00  | <0.001  |
| Crea, mg/dl                          | 1.08                            | 0.98 - 1.31       | 1.08                  | 0.99 - 1.31      | 0.7119  |
| eGFR <sub>C-G</sub> , ml/min/1,73 m² | 76.79                           | 58.43 - 102.94    | 72.76                 | 56.69 - 97.71    | 0.4645  |
| NT-proBNP, pg/ml                     | 751.40                          | 3340.75 - 2182.25 | 900.70                | 436.33 - 2076.25 | 0.6597  |
| K, mmol/l                            | 4.53                            | 4.20 - 4.78       | 4.46                  | 4.30 - 4.80      | 0.4894  |
| Na, mmol/l                           | 141.00                          | 139.00 - 143.00   | 140.00                | 138.00 - 142.00  | 0.0026  |
| LVEDD, mm                            | 60.70                           | 54.75 - 67.55     | 63.00                 | 57.25 - 71.05    | 0.1117  |
| LVESD, mm                            | 51.50                           | 43.58 - 59.05     | 53.30                 | 45.52 - 61.03    | 0.2350  |
| LA, mm                               | 43.10                           | 39.41- 48.70      | 44.30                 | 39.30 - 50.13    | 0.3384  |
| RV, mm                               | 27.40                           | 25.50 - 31.90     | 28.80                 | 26.18 - 32.53    | 0.2109  |
| IVT, mm                              | 11.70                           | 9.80 - 12.90      | 11.20                 | 9.65 - 12.90     | 0.2940  |
| LVPWT, mm                            | 12.00                           | 10.58 - 13.43     | 11.60                 | 9.88 - 13.40     | 0.2591  |
| E/A ratio                            | 0.75                            | 0.60 - 1.66       | 0.94                  | 0.56 - 1.79      | 0.3179  |
| E/e' ratio                           | 7.78                            | 5.56 - 10.61      | 8.00                  | 5.19 - 11.13     | 0.5064  |
| LVEF, %                              | 30.03                           | 22.95 - 36.81     | 31.11                 | 22.60 - 36.94    | 0.8729  |
| E-wave velocity, cm/s                | 60.00                           | 48.00 - 90.25     | 65.00                 | 47.00 - 92.50    | 0.5012  |
| Distance, m                          | 448.00                          | 352.00 - 544.00   | 448.00                | 380.50 - 512.00  | 0.6648  |
| RPE                                  | 12.00                           | 10.00 - 15.00     | 12.00                 | 10.00 - 15.00    | 0.9365  |
| Resting SpO2, %                      | 96.00                           | 95.00 - 97.00     | 96.00                 | 96.00 - 98.00    | 0.0760  |
| SBP <sub>rest</sub> , mmHg           | 136.00                          | 119.75 - 148.25   | 127.00                | 116.00 - 143.75  | 0.0671  |
| SBP <sub>end</sub> , mmHg            | 141.00                          | 123.00 - 160.00   | 139.00                | 125.00 - 152.25  | 0.3146  |
| SBP <sub>recov-1'</sub> , mmHg       | 141.00                          | 122.75 - 158.00   | 131.00                | 117.75 - 147.00  | 0.0608  |
| SBP <sub>recov-3'</sub> , mmHg       | 135.00                          | 124.75 - 155.25   | 134.00                | 115.00 - 145.00  | 0.1118  |
| DBP <sub>rest</sub> , mmHg           | 86.00                           | 77.00 - 95.25     | 81.00                 | 71.75 - 89.00    | 0.0031  |

|                                |        |                |        |                |        |
|--------------------------------|--------|----------------|--------|----------------|--------|
| DBP <sub>end</sub> , mmHg      | 89.00  | 80.75 - 97.00  | 83.00  | 74.00 - 93.00  | 0.0175 |
| DBP <sub>recov-1'</sub> , mmHg | 87.00  | 78.75 - 98.25  | 81.00  | 74.00 - 94.00  | 0.0292 |
| DBP <sub>recov-3'</sub> , mmHg | 87.00  | 79.00 - 97.00  | 82.00  | 73.75 - 91.00  | 0.0252 |
| MBP <sub>rest</sub> , mmHg     | 103.00 | 92.00 - 113.58 | 96.67  | 87.25 - 105.17 | 0.0084 |
| MBP <sub>end</sub> , mmHg      | 107.33 | 94.83 - 118.00 | 101.33 | 92.17 - 111.83 | 0.0566 |
| MBP <sub>recov-1'</sub> , mmHg | 105.67 | 93.33 - 116.17 | 97.33  | 89.92 - 108.75 | 0.0197 |
| MBP <sub>recov-3'</sub> , mmHg | 104.33 | 95.25 - 115.00 | 99.33  | 88.75 - 106.75 | 0.0434 |
| PP <sub>rest</sub> , mmHg      | 47.00  | 36.75 - 58.25  | 47.00  | 41.00 - 57.50  | 0.7696 |
| PP <sub>end</sub> , mmHg       | 51.00  | 37.00 - 65.00  | 52.00  | 41.75 - 62.00  | 0.6734 |
| PP <sub>recov-1'</sub> , mmHg  | 51.00  | 38.00 - 64.00  | 48.00  | 37.50 - 60.50  | 0.5309 |
| PP <sub>recov-3'</sub> , mmHg  | 51.00  | 39.00 - 61.25  | 50.00  | 35.75 - 59.50  | 0.5580 |
| HR <sub>rest</sub> , mmHg      | 73.00  | 64.00 - 82.00  | 70.00  | 64.00 - 80.25  | 0.4046 |
| HR <sub>end</sub> , mmHg       | 87.00  | 75.75 - 103.50 | 85.00  | 77.00 - 100.00 | 0.9024 |
| HR <sub>recov-1'</sub> , mmHg  | 79.00  | 69.00 - 87.25  | 76.00  | 70.00 - 88.50  | 0.5758 |
| HR <sub>recov-3'</sub> , mmHg  | 76.00  | 68.00 - 83.00  | 75.00  | 68.00 - 86.00  | 1      |

Abbreviations: BMI, body mass index; Crea, creatinine; CRT-D, cardiac resynchronization therapy defibrillator; DBP, diastolic blood pressure; E-wave velocity, peak early diastolic LV inflow; E/e' - the ratio of E to the velocity (e') of myocardial tissue at the base of the mitral annulus during early diastole; eGFR<sub>CG</sub> estimated glomerular filtration rate by Cockcroft-Gault equation; HR, heart rate; ICD, implantable cardioverter-defibrillator; IVT, intraventricular septum thickness; K, potassium; LA, left atrium; LVEDD, left ventricle end-diastolic diameter in the parasternal long-axis view; LVEF, left ventricular ejection fraction by the biplane Simpson method; LVESD, left ventricle end-systolic diameter in the parasternal long-axis view; LVPWT, left ventricle posterior (basal segment of the inferolateral) wall thickness, MBP, mean blood pressure; Na, sodium; NT-proBNP, N-terminal pro-B-type natriuretic peptide; NYHA, New York Heart Association I-IV; PP, pulse pressure; SBP, systolic blood pressure; resting SpO<sub>2</sub>, resting stable oxygen saturation; RPE, Borg Rating of Perceived Exertion Scale; RV, right ventricle; 6MWT, 6-minute walk test; '0', start of the 6MWT; end, end of the 6MWT; '1' and '3' of the post-exercise recovery.

**Table S2.** Comparison of qualitative and nominal data of patients with HF and LVEF <50% and implanted defibrillating device divided into subgroups with lower (<195.0 pg/ml) and higher (>195.0 pg/ml) serum aldosterone concentration. Patients from both groups are case-control matched using the criteria of the same rate of spironolactone use and no more than 0.5 mg/dl difference in the creatinine concentration. Data are presented as numbers and %, p-values come from the the exact Fisher test.

|                          | Serum aldosterone concentration |       |                        |       | p-value |
|--------------------------|---------------------------------|-------|------------------------|-------|---------|
|                          | < 158.5 pg/ml<br>N=153          |       | > 158.5 pg/ml<br>N=153 |       |         |
|                          | N                               | %     | N                      | %     |         |
| Men                      | 70                              | 82.35 | 77                     | 90.59 | 0.1165  |
| Ischaemic aetiology      | 31                              | 36.47 | 42                     | 49.41 | 0.0883  |
| Hypertension             | 68                              | 80.00 | 73                     | 85.88 | 0.3080  |
| Diabetes mellitus type 2 | 25                              | 29.41 | 32                     | 37.65 | 0.2554  |
| Current smoker status    | 11                              | 12.94 | 11                     | 12.94 | 1.0000  |
| Stroke/TIA               | 9                               | 10.59 | 11                     | 12.94 | 0.6340  |
| Permanent AF             | 17                              | 20.00 | 18                     | 21.18 | 0.8496  |

|                   |    |       |    |       |        |
|-------------------|----|-------|----|-------|--------|
| NYHA III/IV       | 49 | 32.03 | 57 | 37.25 | 0.3373 |
| Primary/Secondary | 9  | 10.59 | 12 | 14.12 | 0.4844 |
| CRT-D             | 44 | 51.76 | 37 | 43.53 | 0.2824 |
| ACE or ARBs       | 72 | 84.71 | 73 | 85.88 | 0.8286 |
| Beta-blocker      | 68 | 80.00 | 75 | 88.24 | 0.1419 |
| Spironolactone    | 67 | 73.82 | 67 | 73.82 | 1      |
| Diuretic          | 78 | 91.76 | 82 | 96.47 | 0.1923 |
| Statin            | 63 | 74.12 | 71 | 83.53 | 0.1332 |
| Digoxin           | 9  | 10.59 | 7  | 8.24  | 0.5994 |
| Nitrate           | 6  | 7.06  | 13 | 15.29 | 0.0884 |
| Antiplatelet drug | 66 | 77.65 | 69 | 81.18 | 0.5704 |
| Amiodarone        | 18 | 21.18 | 20 | 23.53 | 0.7127 |
| Insulin           | 3  | 3.53  | 8  | 9.41  | 0.1190 |

Abbreviations: ACE, Angiotensin-converting enzyme inhibitor; AF, atrial fibrillation; ARBs, Angiotensin II receptor blocker; CRT-D, cardiac resynchronization therapy defibrillator; NYHA, New York Heart Association III/IV; TIA, transient ischemic attack;

Following case-control matching of patients with lower and higher serum aldosterone, the rate of spironolactone use and kidney function were comparable. No significant differences were found for most continuous and discrete data between patients with lower and higher aldosterone concentrations. However, patients in the higher serum aldosterone group had significantly lower DBP at all phases of the 6MWT and MBP at the pre-test stage and 1 and 3 minutes post-test completion.

In conclusion, higher aldosterone levels are associated with reduced DBP and MBP in patients with systolic HF, regardless of spironolactone use and kidney function.
